# Supplementary material for: Mesenchymal/stromal stem cells: necessary factors in tumour progression
Source: PubMed Central journal article supplement (PMC9307857; doi:10.1038/s41420-022-01107-0), 2022-07-22
Supplement: 41420_2022_1107_MOESM1_ESM.pdf [file 41420_2022_1107_MOESM1_ESM.pdf]

This document certifies that the manuscript

Mesenchymal/ stromal stem cells: inseparable actors in tumor progression

prepared by the authors

Xinyu Li, Qing Fan, Xueqiang Peng, Shuo Yang, Shibo Wei, Jingang Liu, Liang Yang,  
Hangyu Li

was edited for proper English language, grammar, punctuation, spelling, and overall style  
by one or more of the highly qualified native English speaking editors at SNAS.

This certificate was issued on **June 5, 2022** and may be verified  
on the [SNAS website](#) using the verification code **70AD-6352-FF7D-B755-26FB** .

Neither the research content nor the authors' intentions were altered in any way during the editing process. Documents receiving this certification should be English-ready for publication; however, the author has the ability to accept or reject our suggestions and changes. To verify the final SNAS edited version, please visit our verification page at [secure.authorservices.springernature.com/certificate/verify](https://secure.authorservices.springernature.com/certificate/verify).

If you have any questions or concerns about this edited document, please contact SNAS at [support@as.springernature.com](mailto:support@as.springernature.com).
